# Supplementary material for: Inter-assay variability of next-generation sequencing-based gene panels
Source: PubMed Central journal article supplement (PMC9013031; doi:10.1186/s12920-022-01230-y), 2022-04-15

**Figure S4**

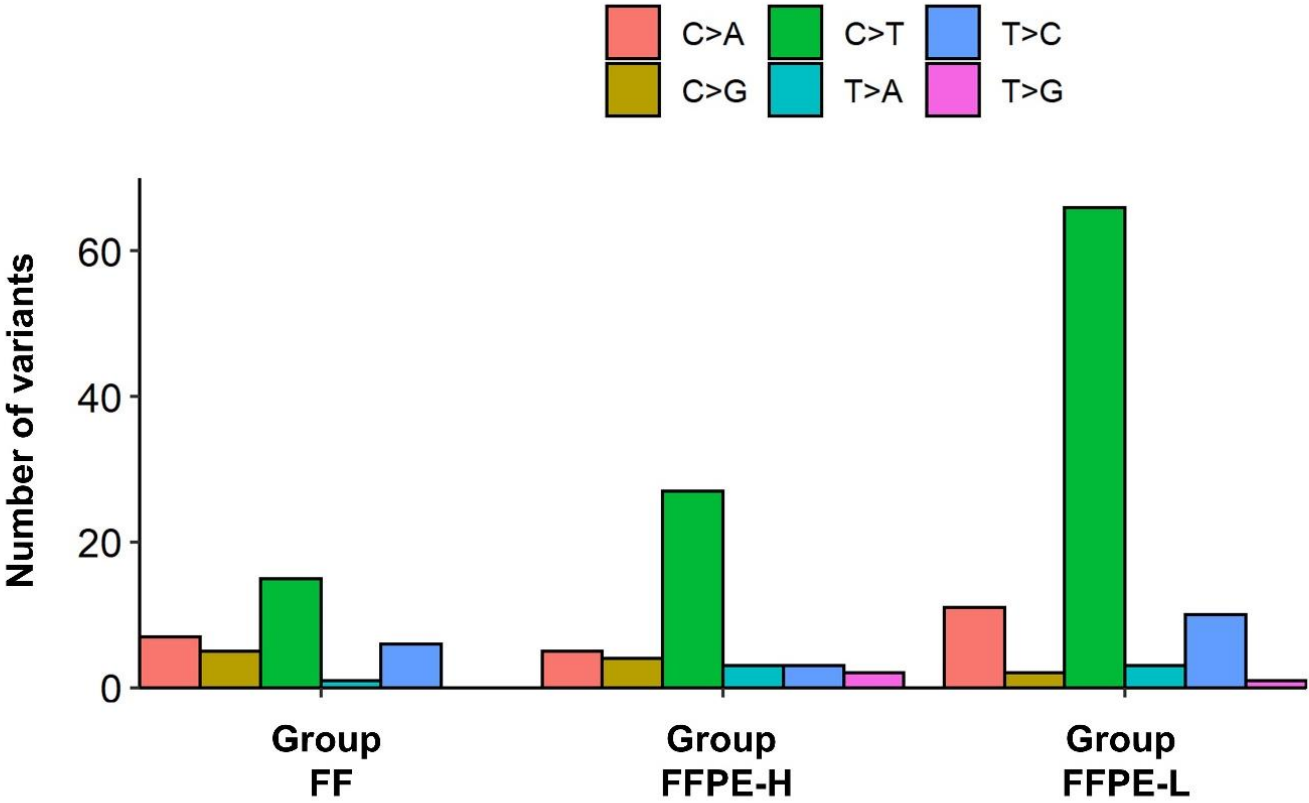

Supplement: 12920_2022_1230_MOESM13_ESM.pdf [file 12920_2022_1230_MOESM13_ESM.pdf]
